# Supplementary material for: Ketene–acetylene [2 + 2] cycloadditions: cyclobutenone and/or oxete formation?
Source: Royal Society of Chemistry journal article supplement (doi:10.1039/b309549e), 2004-01-01
Supplement: b309549e.pdf [file b309549e.pdf]

# Ketene - acetylene [2+2] cycloadditions: cyclobutenone and/or oxete formation?

## Electronic supplementary information

|                                                | HF/6-31G(d)<br>optimisation<br>a.u. | MP2(fc)/6-31G(d)<br>optimisation<br>a.u. | MP2/6-311+G(3d,2p)<br>single point<br>a.u. | QCISD(T)/6-31G(d)<br>single point<br>a.u. | HF/6-31G(d)<br>ZPVE<br>kcal/mol | G2(MP2,SVP)<br>incl. ZPVE<br>kJ/mol | B3LYP/6-31G(d)<br>optimisation<br>a.u. | B3LYP/6-31G(d)<br>relative energies<br>kJ/mol |
|------------------------------------------------|-------------------------------------|------------------------------------------|--------------------------------------------|-------------------------------------------|---------------------------------|-------------------------------------|----------------------------------------|-----------------------------------------------|
| <b>ketene</b>                                  | -151,72467                          | -152,14749                               | -152,32228                                 | -152,17891                                | 21,47                           |                                     | -152,59847                             |                                               |
| <b><u>R=H</u></b>                              |                                     |                                          |                                            |                                           |                                 |                                     |                                        |                                               |
| <b>H<sub>2</sub>C=C=O + H-CCH</b>              | -228,54250                          | -229,21428                               | -229,47909                                 | -229,27301                                | 39,95                           | 0,0                                 | -229,92412                             | 0,0                                           |
| <b>TS C=O</b>                                  | -228,43552                          | -229,11940                               | -229,38865                                 | -229,17587                                | 40,71                           | 246,2                               | -229,84681                             | 203,0                                         |
| <b>TS C=C</b>                                  | -228,46166                          | -229,16266                               | -229,43015                                 | -229,22251                                | 41,95                           | -36,0                               | -229,88096                             | 113,3                                         |
| <b>1</b>                                       | -228,60393                          | -229,27906                               | -229,53788                                 | -229,33765                                | 46,29                           | -105,5                              |                                        |                                               |
| <b>TS 1</b>                                    | -228,54071                          | -229,23416                               | -229,49684                                 | -229,23416                                | 44,17                           | -93,7                               |                                        |                                               |
| <b>2</b>                                       | -228,55553                          | -229,23443                               | -229,49820                                 | -229,29600                                | 45,73                           | 69,4                                |                                        |                                               |
| <b>TS 2</b>                                    | -228,50367                          | -229,19164                               | -229,45494                                 | -229,25299                                | 43,39                           | 133,0                               |                                        |                                               |
| <b>s-trans 3</b>                               | -228,60701                          | -229,28039                               | -229,54291                                 | -229,33947                                | 44,82                           | -150,3                              |                                        |                                               |
| <b>s-cis 3</b>                                 | -228,60423                          | -229,27806                               | -229,54049                                 | -229,33700                                | 44,63                           | -144,3                              |                                        |                                               |
| <b>s-trans 4</b>                               | -228,59202                          | -229,26178                               | -229,52179                                 | -229,32467                                | 44,63                           | -130,3                              |                                        |                                               |
| <b>s-cis 4</b>                                 | -228,58751                          | -229,25751                               | -229,51700                                 | -229,32055                                | 44,55                           | 123,4                               |                                        |                                               |
| <b>1,3-H shift TS</b>                          | -228,46492                          | -229,16545                               | -229,43370                                 | -229,22426                                | 40,82                           | 122,2                               |                                        |                                               |
| <b><u>R=CH<sub>3</sub></u></b>                 |                                     |                                          |                                            |                                           |                                 |                                     |                                        |                                               |
| <b>H<sub>2</sub>C=C=O + H<sub>3</sub>C-CCH</b> | -267,58899                          | -268,38930                               | -268,70705                                 | -268,46341                                | 59,18                           | 0,0                                 | -269,25174                             | 0,00                                          |
| <b>TS C=O</b>                                  | -267,49903                          | -268,30190                               | -268,62532                                 | -268,38055                                | 60,39                           | 207,2                               | -269,18563                             | 173,6                                         |
| <b>TS C=C</b>                                  | -267,51292                          | -268,34344                               | -268,66396                                 | -268,41816                                | 61,17                           | 119,0                               | -269,21327                             | 101,0                                         |
| <b>1</b>                                       | -267,64914                          | -268,45566                               | -268,76774                                 | -268,52933                                | 64,93                           | -136,7                              |                                        |                                               |
| <b>TS 1</b>                                    | -267,58475                          | -268,40961                               | -268,72569                                 | -268,48054                                | 62,71                           | -27,4                               |                                        |                                               |
| <b>2</b>                                       | -267,60477                          | -268,41468                               | -268,73128                                 | -268,49117                                | 64,35                           | -50,5                               |                                        |                                               |
| <b>TS 2</b>                                    | -267,55193                          | -268,37035                               | -268,68678                                 | -268,44721                                | 61,87                           | 56,0                                |                                        |                                               |
| <b>s-trans 3</b>                               | -267,64564                          | -268,45237                               | -268,76879                                 | -268,52662                                | 63,70                           | -145,6                              |                                        |                                               |
| <b>s-cis 3</b>                                 | -267,64347                          | -268,45028                               | -268,76573                                 | -268,52437                                | 63,65                           | -137,3                              |                                        |                                               |
| <b>s-trans 4</b>                               | -267,63645                          | -268,43795                               | -268,75133                                 | -268,51664                                | 63,35                           | -112,7                              |                                        |                                               |
| <b>s-cis 4</b>                                 | -267,63385                          | -268,43482                               | -268,74769                                 | -268,51360                                | 63,26                           | -103,7                              |                                        |                                               |
| <b>1,3-CH<sub>3</sub> shift TS</b>             | -267,48113                          | -268,31732                               | -268,63932                                 | -268,39013                                | 60,72                           | 187,0                               |                                        |                                               |
| <b><u>R=OH</u></b>                             |                                     |                                          |                                            |                                           |                                 |                                     |                                        |                                               |
| <b>H<sub>2</sub>C=C=O + HO-CCH</b>             | -303,38631                          | -304,23298                               | -304,59015                                 | -304,29573                                | 43,31                           | 0,0                                 | -305,12962                             | 0,00                                          |
| <b>TS C=O</b>                                  | -303,31725                          | -304,17006                               | -304,53358                                 | -304,23749                                | 45,43                           | 144,2                               | -305,08173                             | 125,7                                         |
| <b>TS C=C</b>                                  | -303,31844                          | -304,19419                               | -304,55410                                 | -304,25547                                | 45,70                           | 107,4                               | -305,09917                             | 79,9                                          |
| <b>1</b>                                       | -303,47057                          | -304,32304                               | -304,67492                                 | -304,38434                                | 49,86                           | -194,3                              |                                        |                                               |
| <b>TS 1</b>                                    | -303,41195                          | -304,28139                               | -304,63688                                 | -304,34028                                | 47,80                           | -95,8                               |                                        |                                               |
| <b>2</b>                                       | -303,42556                          | -304,27941                               | -304,63611                                 | -304,34333                                | 48,88                           | -102,9                              |                                        |                                               |
| <b>TS 2</b>                                    | -303,38945                          | -304,24901                               | -304,60484                                 | -304,31338                                | 46,97                           | -29,1                               |                                        |                                               |
| <b>s-trans 3</b>                               | -303,46681                          | -304,31760                               | -304,67281                                 | -304,37972                                | 48,10                           | -197,5                              |                                        |                                               |
| <b>s-cis 3</b>                                 | -303,46282                          | -304,31493                               | -304,66957                                 | -304,37707                                | 48,10                           | -189,0                              |                                        |                                               |
| <b>s-trans 4</b>                               | -303,48150                          | -304,32805                               | -304,67889                                 | -304,39426                                | 48,65                           | -222,1                              |                                        |                                               |
| <b>s-cis 4</b>                                 | -303,48120                          | -304,32784                               | -304,67828                                 | -304,39404                                | 48,64                           | -220,5                              |                                        |                                               |

|                                                              |            |            |            |            |       |        |            |       |  |
|--------------------------------------------------------------|------------|------------|------------|------------|-------|--------|------------|-------|--|
| 1,3-OH shift TS                                              | -303,37744 | -304,24689 | -304,60066 | -304,30821 | 46,64 | -11,4  |            |       |  |
| <b><u>R=OCH<sub>3</sub></u></b>                              |            |            |            |            |       |        |            |       |  |
| H <sub>2</sub> C=C=O + H <sub>3</sub> CO-CCH                 | -342,41488 | -343,38919 | -343,79397 | -343,46876 | 62,90 | 0,0    | -344,43880 | 0,00  |  |
| TS C=O                                                       | -342,3544  | -343,33779 | -343,74908 | -343,42257 | 64,43 | 109,9  | -344,40063 | 100,2 |  |
| TS C=C                                                       | -342,35228 | -343,35378 | -343,76169 | -343,43371 | 64,99 | 91,6   | -344,41203 | 70,3  |  |
| 1                                                            | -342,49954 | -343,48095 | -343,88144 | -343,55928 | 68,90 | -204,0 |            |       |  |
| TS 1                                                         | -342,43884 | -343,43765 | -343,84116 | -343,51371 | 66,72 | -100,4 |            |       |  |
| 2                                                            | -342,45215 | -343,43464 | -343,83857 | -343,51566 | 67,99 | -101,9 |            |       |  |
| TS 2                                                         | -342,41552 | -343,40436 | -343,80794 | -343,48587 | 65,93 | -30,5  |            |       |  |
| s-trans 3                                                    | -342,49335 | -343,47339 | -343,87713 | -343,5526  | 67,49 | -200,2 |            |       |  |
| s-cis 3                                                      | -342,48916 | -343,47086 | -343,87399 | -343,54996 | 67,41 | -192,0 |            |       |  |
| s-trans 4                                                    | -342,50768 | -343,48269 | -343,88187 | -343,56629 | 67,59 | -223,8 |            |       |  |
| s-cis 4                                                      | -342,50749 | -343,48267 | -343,88163 | -343,56622 | 67,56 | -223,2 |            |       |  |
| 1,3-OCH <sub>3</sub> shift TS                                | -342,40911 | -343,40955 | -343,81169 | -343,48722 | 65,64 | -31,3  |            |       |  |
| <b><u>R=SH</u></b>                                           |            |            |            |            |       |        |            |       |  |
| H <sub>2</sub> C=C=O + HS-CCH                                | -626,05245 | -626,84302 | -627,19057 | -626,91782 | 40,20 | 0,0    | -628,11335 | 0,00  |  |
| TS C=O                                                       | -625,97551 | -626,77314 | -627,12909 | -626,85444 | 42,89 | 154,4  | -628,06582 | 124,8 |  |
| TS C=C                                                       | -625,97909 | -626,80052 | -627,15152 | -626,87573 | 42,57 | 110,3  | -628,08170 | 83,1  |  |
| 1                                                            | -626,11883 | -626,91788 | -627,25989 | -626,99096 | 46,15 | -155,2 |            |       |  |
| TS 1                                                         | -626,05864 | -626,87604 | -627,22127 | -626,94618 | 44,17 | -53,5  |            |       |  |
| 2                                                            | -626,06811 | -626,87072 | -627,21629 | -626,94696 | 45,31 | -52,2  |            |       |  |
| TS 2                                                         | -626,02304 | -626,83405 | -627,17939 | -626,91010 | 43,19 | 37,2   |            |       |  |
| s-trans 3                                                    | -626,11201 | -626,91026 | -627,25522 | -626,98427 | 44,53 | -151,5 |            |       |  |
| s-cis 3                                                      | -626,11208 | -626,90981 | -627,25392 | -626,98372 | 44,73 | -147,1 |            |       |  |
| s-trans 4                                                    | -626,11080 | -626,90664 | -627,24796 | -626,98488 | 44,74 | -142,7 |            |       |  |
| s-cis 4                                                      | -626,10946 | -626,90447 | -627,24547 | -626,98283 | 44,70 | -136,7 |            |       |  |
| 1,3-SH shift TS                                              | -626,02512 | -626,84677 | -627,19556 | -626,92016 | 43,05 | 1,3    |            |       |  |
| <b><u>R=NH<sub>2</sub></u></b>                               |            |            |            |            |       |        |            |       |  |
| H <sub>2</sub> C=C=O + H <sub>2</sub> N-CCH                  | -283,57024 | -284,40143 | -284,73832 | -284,47006 | 51,76 | 0,0    | -285,27651 | 0,00  |  |
| TS C=O                                                       | -283,52689 | -284,36200 | -284,70498 | -284,43573 | 55,26 | 87,2   | -285,25124 | 66,3  |  |
| TS C=C                                                       | -283,51897 | -284,36862 | -284,70838 | -284,44077 | 54,95 | 81,3   | -285,25757 | 49,7  |  |
| 1                                                            | -283,64960 | -284,48773 | -284,82010 | -284,55395 | 57,66 | -186,3 |            |       |  |
| TS 1                                                         | -283,59294 | -284,44641 | -284,78201 | -284,51081 | 55,80 | -88,5  |            |       |  |
| 2                                                            | -283,60122 | -284,44028 | -284,77695 | -284,50971 | 57,06 | -83,7  |            |       |  |
| TS 2                                                         | -283,56211 | -284,40820 | -284,74445 | -284,47799 | 54,94 | -7,3   |            |       |  |
| s-trans 3                                                    | -283,63731 | -284,47512 | -284,81008 | -284,54333 | 56,70 | -168,8 |            |       |  |
| s-cis 3                                                      | -283,63599 | -284,47446 | -284,80900 | -284,54236 | 56,66 | -165,3 |            |       |  |
| s-trans 4                                                    | -283,64874 | -284,48117 | -284,81410 | -284,55301 | 56,10 | -191,2 |            |       |  |
| s-cis 4                                                      | -283,64659 | -284,47848 | -284,81073 | -284,55056 | 56,36 | -182,0 |            |       |  |
| 1,3-NH <sub>2</sub> shift TS                                 | -283,55790 | -284,41073 | -284,74572 | -284,47876 | 55,69 | -3,2   |            |       |  |
| <b><u>R=N(CH<sub>3</sub>)<sub>2</sub></u></b>                |            |            |            |            |       |        |            |       |  |
| H <sub>2</sub> C=C=O + (H <sub>3</sub> C) <sub>2</sub> N-CCH | -361,62822 | -362,72146 | -363,15968 | -362,82192 | 89,99 | 0,0    | -363,89603 | 0,00  |  |
| TS C=O                                                       | -361,59583 | -362,69803 | -363,14308 | -362,80328 | 93,29 | 43,3   | -363,88266 | 35,1  |  |
| TS C=C                                                       | -361,58634 | -362,70088 | -363,14342 | -362,80477 | 93,03 | 45,0   | -363,88515 | 28,6  |  |
| 1                                                            | -361,70781 | -362,81070 | -363,24495 | -362,90924 | 95,81 | -197,1 |            |       |  |
| TS 1                                                         | -361,64888 | -362,76807 | -363,20552 | -362,86464 | 93,79 | -95,9  |            |       |  |

|                                                    |            |            |            |            |       |        |             |       |
|----------------------------------------------------|------------|------------|------------|------------|-------|--------|-------------|-------|
| <b>2</b>                                           | -361,66063 | -362,76353 | -363,20148 | -362,86494 | 95,03 | -93,4  |             |       |
| <b>TS 2</b>                                        | -361,62125 | -362,73189 | -363,16957 | -362,83394 | 92,93 | -19,2  |             |       |
| <b>s-trans 3</b>                                   | -361,68923 | -362,79311 | -363,23051 | -362,89322 | 94,63 | -167,7 |             |       |
| <b>s-cis 3</b>                                     | -361,68853 | -362,79324 | -363,23010 | -362,89298 | 94,71 | -165,4 |             |       |
| <b>s-trans 4</b>                                   | -361,69765 | -362,79697 | -363,23112 | -362,90137 | 94,55 | -180,9 |             |       |
| <b>s-cis 4</b>                                     | -361,69860 | -362,79618 | -363,22949 | -362,90077 | 94,40 | -177,7 |             |       |
| <b>1,3-N(CH<sub>3</sub>)<sub>2</sub> shift TS</b>  | -361,62131 | -362,74243 | -363,18022 | -362,84193 | 93,34 | -38,9  |             |       |
| <b><u>R=F</u></b>                                  |            |            |            |            |       |        |             |       |
| <b>H<sub>2</sub>C=C=O + F-CCH</b>                  | -327,36785 | -328,20778 | -328,58382 | -328,26674 | 35,64 | 0,0    | -329,13474  | 0,00  |
| <b>TS C=O</b>                                      | -327,27184 | -328,12340 | -328,50631 | -328,18418 | 36,56 | 202,2  | -329,05721  | 203,5 |
| <b>TS C=C</b>                                      | -327,28720 | -328,16175 | -328,54140 | -328,21753 | 37,15 | 125,4  | -329,09364  | 107,9 |
| <b>1</b>                                           | -327,45638 | -328,30011 | -328,67226 | -328,35840 | 41,37 | -209,1 |             |       |
| <b>TS 1</b>                                        | -327,39939 | -328,26030 | -328,63587 | -328,31565 | 39,23 | -113,8 |             |       |
| <b>2</b>                                           | -327,41159 | -328,25799 | -328,63387 | -328,31861 | 40,75 | -116,7 |             |       |
| <b>TS 2</b>                                        | -327,37437 | -328,22588 | -328,60147 | -328,28673 | 38,36 | -41,1  |             |       |
| <b>s-trans 3</b>                                   | -327,46048 | -328,30202 | -328,67588 | -328,36098 | 39,78 | -226,2 |             |       |
| <b>s-cis 3</b>                                     | -327,45695 | -328,29908 | -328,67341 | -328,35811 | 39,73 | -220,1 |             |       |
| <b>s-trans 4</b>                                   | -327,47020 | -328,30843 | -328,67926 | -328,37084 | 39,98 | -243,4 |             |       |
| <b>s-cis 4</b>                                     | -327,46897 | -328,30711 | -328,67828 | -328,36952 | 39,90 | -241,2 |             |       |
| <b>1,3-F shift TS</b>                              | -327,36932 | -328,23056 | -328,60331 | -328,28901 | 37,68 | -42,2  |             |       |
| <b><u>R=Cl</u></b>                                 |            |            |            |            |       |        |             |       |
| <b>H<sub>2</sub>C=C=O + Cl-CCH</b>                 | -687,43227 | -688,23403 | -688,58078 | -688,30337 | 34,71 | 0,0    | -689,51173  | 0,00  |
| <b>TS C=O</b>                                      | -687,33071 | -688,14074 | -688,49443 | -688,21816 | 35,68 | 209,1  | -689,44494  | 175,4 |
| <b>TS C=C</b>                                      | -687,34813 | -688,18650 | -688,53647 | -688,25479 | 36,35 | 125,2  | -689,47039  | 108,5 |
| <b>1</b>                                           | -687,50598 | -688,31410 | -688,65415 | -688,38223 | 40,32 | -168,5 |             |       |
| <b>TS 1</b>                                        | -687,44463 | -688,27195 | -688,61562 | -688,33683 | 38,16 | -149,6 |             |       |
| <b>2</b>                                           | -687,45564 | -688,26825 | -688,61311 | -688,33904 | 39,64 | -70,3  |             |       |
| <b>TS 2</b>                                        | -687,41073 | -688,23083 | -688,57510 | -688,30165 | 37,15 | 20,1   |             |       |
| <b>s-trans 3</b>                                   | -687,50572 | -688,31210 | -688,65626 | -688,38103 | 38,81 | -181,8 |             |       |
| <b>s-cis 3</b>                                     | -687,50389 | -688,31032 | -688,65300 | -688,37926 | 38,86 | -173,1 |             |       |
| <b>s-trans 4</b>                                   | -687,50193 | -688,30706 | -688,64785 | -688,37974 | 38,70 | -170,0 |             |       |
| <b>s-cis 4</b>                                     | -687,50139 | -688,30626 | -688,64620 | -688,37893 | 38,66 | -165,7 |             |       |
| <b>1,3-Cl shift TS</b>                             | -687,43369 | -688,24790 | -688,59315 | -688,31729 | 36,75 | -25,0  |             |       |
| <b><u>R=OEt</u></b>                                |            |            |            |            |       |        |             |       |
| <b>(CF<sub>3</sub>)<sub>2</sub>C=C=O</b>           |            |            |            |            |       |        | -826,66168  |       |
| <b>EtO-CCH</b>                                     |            |            |            |            |       |        | -231,16061  |       |
| <b>(CF<sub>3</sub>)<sub>2</sub>C=C=O + EtO-CCH</b> |            |            |            |            |       |        | -1057,82229 | 0,0   |
| <b>TS C=O</b>                                      |            |            |            |            |       |        | -1057,80754 | 38,7  |
| <b>TS C=C</b>                                      |            |            |            |            |       |        | -1057,80545 | 44,2  |
